# Supplementary material for: Niclosamide Suppresses the Expansion of Follicular Helper T Cells and Alleviates Disease Severity in Two Murine Models of Lupus via STAT3
Source: Research Square preprint supplement (doi:10.21203/rs.3.rs-110581/v1), 2020-11-19
Supplement: Supplementary file 1 [file 8b368247d7725af479cf9a8a.docx]

**Supplementary Figures**

**Figure S1.** **Niclosamide promotes the proportion of CD25+Foxp3+CD4+ T cells (Treg cells) in MRL/*lpr* mice.**

Spleen samples were collected from each group of 16-week-old mice. All samples were analyzed by flow cytometry. **a** Data show the proportion of Th1 (IFNγ+) cells or Th17 (IL-17+) cells gated by CD4+ T cells. **b, c** Bar graphs show mean ± SD. **d** Data show proportion of CD25+Foxp3+ regulatory T cells gated by CD4+ T cells. **e** Bar graphs show mean ± SD. * = *P* < 0.05, ns: not significant.

**Figure S2.** **Niclosamide inhibits the proportion of Th1 cells in R848-induced mice.**

Spleen samples were collected from each group of 12-week-old mice. All samples were analyzed by flow cytometry. **a** Data show proportion of Th1 (IFNγ+) cells or Th17 (IL-17+) cells gated by CD4+ T cells. **b, c** Bar graphs show mean ± SD. ns: not significant, * = *P* < 0.05, ** = *P* < 0.01, ns: not significant.
